# Supplementary material
Source: publisher figshare collection journal article supplement (https://geolsoc.figshare.com/ndownloader/files/15341531)
Supplement: Supplementary file 1 [file 15341531]

**Arran**

Mean value: 2,7307

Std.-Dev.: 0,3385

Variance: 0,1146

Maximum: 3,8438

Minimum: 2,1644

Total N: 50

**Bute**

Mean value: 0,7769

Std.-Dev.: 0,0422

Variance: 0,0018

Maximum: 0,8648

Minimum: 0,6586

Total N: 50

**East Trodigal**

Mean value: 0,4326

Std.-Dev.: 0,0305

Variance: 0,0009

Maximum: 0,4963

Minimum: 0,3744

Total N: 50

**Hanwood**

Mean value: 0,5248

Std.-Dev.: 0,0247

Variance: 0,0006

Maximum: 0,5777

Minimum: 0,4866

Total N: 49

**High Tirfergus**

Mean value: 0,3786

Std.-Dev.: 0,0256

Variance: 0,0007

Maximum: 0,4297

Minimum: 0,3268

Total N: 50

**Ingleton**

Mean value: 0,4044

Std.-Dev.: 0,0347

Variance: 0,0012

Maximum: 0,4913

Minimum: 0,3404

Total N: 51

**Inninmore Bay**

Mean value: 0,6618

Std.-Dev.: 0,0419

Variance: 0,0018

Maximum: 0,7393

Minimum: 0,5427

Total N: 50

**Kello Water**

Mean value: 0,5706

Std.-Dev.: 0,0383

Variance: 0,0015

Maximum: 0,6736

Minimum: 0,5013

Total N: 52

**Midsomer Norton**

Mean value: 1,0664

Std.-Dev.: 0,0532

Variance: 0,0028

Maximum: 1,1777

Minimum: 0,9263

Total N: 50

**Pembroke**

Mean value: 2,1323

Std.-Dev.: 0,1295

Variance: 0,0168

Maximum: 2,4454

Minimum: 1,8739

Total N: 55

**Rowanburn**

Mean value: 0,5822

Std.-Dev.: 0,0339

Variance: 0,0011

Maximum: 0,6673

Minimum: 0,4955

Total N: 50

**Tan Hill**

Mean value: 0,8373

Std.-Dev.: 0,0511

Variance: 0,0026

Maximum: 0,9620

Minimum: 0,7292

Total N: 50

**Uddingstone**

Mean value: 0,5332

Std.-Dev.: 0,0307

Variance: 0,0009

Maximum: 0,6037

Minimum: 0,4823

Total N: 50

**Wrexham**

Mean value: 0,6548

Std.-Dev.: 0,0266

Variance: 0,0007

Maximum: 0,7109

Minimum: 0,5653

Total N: 50

***Correspondence (L.A.Bullock@soton.ac.uk)***
